# Supplementary material for: Deep learning versus human graders for classifying diabetic retinopathy severity in a nationwide screening program
Source: Springer Nature journal article supplement (doi:10.1038/s41746-019-0099-8), 2019-04-10
Supplement: 41746_2019_99_MOESM1_ESM.pdf [file 41746_2019_99_MOESM1_ESM.pdf]

## Deep Learning Versus Human Graders for Classifying Diabetic Retinopathy Severity in a Nationwide Screening Program -- Supplement

|                 |               | Algorithm   |               |
|-----------------|---------------|-------------|---------------|
|                 |               | DR Gradable | DR Ungradable |
| Regional Grader | DR Gradable   | 25,348      | 1,765         |
|                 | DR Ungradable | 1,239       | 1,591         |

|                 |                | Algorithm    |                |
|-----------------|----------------|--------------|----------------|
|                 |                | DME Gradable | DME Ungradable |
| Regional Grader | DME Gradable   | 24,332       | 2,467          |
|                 | DME Ungradable | 1,036        | 2,108          |

**Supplementary Table 1. Agreement between regional graders and the algorithm DR and DME image gradability.**

|              |               | Regional Grader |               |
|--------------|---------------|-----------------|---------------|
|              |               | DR Gradable     | DR Ungradable |
| Adjudication | DR Gradable   | 56              | 155           |
|              | DR Ungradable | 547             | 224           |

|              |               | Algorithm   |               |
|--------------|---------------|-------------|---------------|
|              |               | DR Gradable | DR Ungradable |
| Adjudication | DR Gradable   | 155         | 56            |
|              | DR Ungradable | 224         | 547           |

**Supplementary Table 2. Agreement between adjudication and regional grader or algorithm for DR gradability.** Only images where the regional grader and the algorithm disagreed on DR gradability is included in this analysis.

|              |                | Regional Grader |                |
|--------------|----------------|-----------------|----------------|
|              |                | DME Gradable    | DME Ungradable |
| Adjudication | DME Gradable   | 493             | 277            |
|              | DME Ungradable | 196             | 28             |

|              |                | Algorithm    |                |
|--------------|----------------|--------------|----------------|
|              |                | DME Gradable | DME Ungradable |
| Adjudication | DME Gradable   | 277          | 493            |
|              | DME Ungradable | 28           | 196            |

**Supplementary Table 3. Agreement between adjudication and regional grader or algorithm for DME gradability.** Only images where the regional grader and the algorithm disagreed on DR gradability is included in this analysis.

|                           | Moderate or Worse DR |                   |                   |                      |                   |                      | Severe or Worse DR |                   |                      |                     |                   |                      | Proliferative DR |                   |                   |                      |                      |                       | DME             |                   |                     |                    |                   |                      |
|---------------------------|----------------------|-------------------|-------------------|----------------------|-------------------|----------------------|--------------------|-------------------|----------------------|---------------------|-------------------|----------------------|------------------|-------------------|-------------------|----------------------|----------------------|-----------------------|-----------------|-------------------|---------------------|--------------------|-------------------|----------------------|
|                           | n                    | Sensitivity       |                   | Specificity          |                   | AUC                  | n                  | Sensitivity       |                      | Specificity         |                   | AUC                  | n                | Sensitivity       |                   | Specificity          |                      | AUC                   | n               | Sensitivity       |                     | Specificity        |                   | AUC                  |
| Regional Grader Expertise | Regional Grader      | Algorithm         | Regional Grader   | Algorithm            | Algorithm         | Regional Grader      | Algorithm          | Regional Grader   | Algorithm            | Algorithm           | Regional Grader   | Algorithm            | Regional Grader  | Algorithm         | Algorithm         | Regional Grader      | Algorithm            | Algorithm             | Regional Grader | Algorithm         | Regional Grader     | Algorithm          | Algorithm         |                      |
| (All regions)             | 3,069                | 73.48 [72, 75.03] | 96.87 [96, 97.46] | 98.09 [98, 98.26]    | 95.63 [95, 95.89] | 98.78 [98.67, 98.91] | 599                | 60.60 [57, 64.54] | 93.32 [91, 95.19]    | 99.70 [100, 99.77]  | 97.59 [97, 97.78] | 99.16 [99.01, 99.30] | 394              | 61.17 [56, 66.01] | 72.34 [68, 76.70] | 99.78 [100, 99.83]   | 99.85 [100, 99.89]   | 99.38 [99.15, 99.60]  | 1,843           | 62.07 [60, 64.29] | 95.23 [94, 96.15]   | 99.24 [99, 99.35]  | 98.21 [98, 98.38] | 99.39 [99.32, 99.42] |
| Nurse or Technician       | 288                  | 44.10 [38, 50.04] | 99.31 [98, 99.92] | 99.44 [99, 99.69]    | 94.49 [94, 95.36] | 99.16 [98.89, 99.34] | 62                 | 69.35 [56, 80.44] | 95.16 [87, 98.99]    | 99.30 [99, 99.58]   | 98.08 [97, 98.57] | 99.53 [99.27, 99.62] | 26               | 57.69 [37, 76.65] | 69.23 [68, 76.70] | 99.24 [99, 99.53]    | 99.85 [100, 99.96]   | 99.42 [99.11, 99.60]  | 194             | 45.36 [38, 52.65] | 91.24 [86, 94.81]   | 98.93 [98, 99.30]  | 98.93 [98, 99.30] | 99.38 [99.24, 99.60] |
| Nurse or Technician       | 113                  | 73.45 [64, 81.32] | 96.46 [91, 99.03] | 96.53 [95, 97.43]    | 98.70 [98, 99.23] | 99.51 [99.34, 99.67] | 22                 | 72.73 [50, 89.27] | 81.82 [60, 94.81]    | 99.46 [99, 99.77]   | 98.71 [98, 99.22] | 99.22 [98.74, 99.75] | 17               | 82.35 [57, 96.20] | 70.59 [44, 89.69] | 99.66 [99, 99.89]    | 99.93 [100, 100.00]  | 99.44 [99.04, 99.94]  | 74              | 58.11 [46, 69.49] | 98.65 [93, 99.97]   | 98.31 [97, 98.92]  | 99.19 [99, 99.60] | 99.89 [99.79, 99.96] |
| Nurse or Technician       | 117                  | 91.45 [85, 95.83] | 99.15 [99, 99.98] | 97.29 [96, 98.32]    | 94.59 [93, 96.07] | 99.46 [99.28, 99.54] | 23                 | 52.17 [31, 73.18] | 100.00 [100, 100.00] | 99.77 [99, 99.97]   | 96.67 [95, 97.76] | 99.65 [99.45, 99.90] | 11               | 27.27 [6, 60.97]  | 90.91 [59, 99.77] | 99.89 [99, 100.00]   | 99.89 [100, 100.00]  | 99.51 [98.50, 100.00] | 60              | 68.33 [55, 79.74] | 96.67 [88, 99.59]   | 98.82 [98, 99.46]  | 98.30 [97, 99.09] | 99.64 [99.20, 99.80] |
| Nurse or Technician       | 339                  | 89.38 [86, 92.45] | 94.10 [91, 96.36] | 93.95 [92, 95.32]    | 95.59 [94, 96.75] | 98.45 [98.10, 98.88] | 65                 | 56.92 [44, 69.15] | 96.92 [89, 99.63]    | 99.77 [99, 99.95]   | 94.53 [93, 95.69] | 98.87 [98.13, 99.12] | 49               | 57.14 [42, 71.18] | 73.47 [59, 85.05] | 99.77 [99, 99.95]    | 99.85 [99, 99.98]    | 99.66 [99.34, 99.71]  | 243             | 58.85 [52, 65.10] | 98.35 [96, 99.55]   | 99.61 [99, 99.89]  | 96.21 [95, 97.29] | 99.38 [99.06, 99.53] |
| Nurse or Technician       | 218                  | 66.51 [60, 72.74] | 92.66 [88, 95.75] | 99.45 [99, 99.67]    | 97.10 [96, 97.64] | 97.74 [96.92, 98.36] | 27                 | 77.78 [58, 91.38] | 96.30 [81, 99.91]    | 99.94 [100, 99.99]  | 99.28 [99, 99.53] | 99.62 [99.18, 99.94] | 14               | 78.57 [49, 95.34] | 92.86 [66, 99.99] | 99.94 [100, 99.99]   | 99.97 [100, 100.00]  | 99.95 [99.85, 100.00] | 89              | 65.17 [54, 74.96] | 97.75 [92, 99.73]   | 99.73 [99, 99.88]  | 98.67 [98, 99.03] | 99.71 [99.65, 99.82] |
| Nurse or Technician       | 347                  | 63.40 [58, 68.48] | 97.12 [95, 98.61] | 98.99 [98, 99.41]    | 94.13 [93, 95.21] | 98.60 [98.21, 98.95] | 94                 | 32.98 [24, 43.44] | 92.55 [85, 96.95]    | 99.85 [100, 99.97]  | 95.46 [94, 96.35] | 98.23 [97.87, 98.94] | 65               | 26.15 [16, 38.54] | 60.00 [47, 71.96] | 100.00 [100, 100.00] | 99.75 [99, 99.92]    | 98.53 [97.77, 99.58]  | 235             | 56.17 [50, 62.61] | 100.00 [98, 100.00] | 99.75 [99, 99.93]  | 97.74 [97, 98.41] | 99.82 [99.59, 99.76] |
| Ophthalmologist           | 125                  | 54.40 [45, 63.33] | 98.40 [94, 99.81] | 99.54 [99, 99.79]    | 94.96 [94, 95.89] | 98.86 [98.30, 99.16] | 13                 | 30.77 [9, 61.43]  | 84.62 [55, 98.08]    | 99.90 [100, 99.99]  | 99.13 [99, 99.49] | 99.49 [98.99, 99.90] | 8                | 50.00 [16, 84.30] | 50.00 [16, 84.30] | 99.90 [100, 99.99]   | 100.00 [100, 100.00] | 98.96 [97.89, 99.95]  | 78              | 50.00 [38, 61.54] | 96.15 [89, 99.20]   | 99.85 [100, 99.97] | 99.24 [99, 99.58] | 99.81 [99.65, 99.89] |
| Ophthalmologist           | 650                  | 95.54 [94, 96.99] | 98.31 [97, 99.15] | 95.84 [95, 96.53]    | 96.01 [95, 96.68] | 98.96 [98.82, 99.20] | 61                 | 65.57 [52, 77.27] | 96.72 [89, 99.60]    | 99.94 [100, 99.99]  | 97.10 [97, 97.62] | 99.31 [98.87, 99.48] | 41               | 78.05 [62, 89.44] | 73.17 [57, 85.78] | 99.95 [100, 99.99]   | 99.86 [100, 99.96]   | 99.74 [99.58, 99.85]  | 349             | 79.66 [75, 83.76] | 85.96 [82, 89.43]   | 99.26 [99, 99.52]  | 98.36 [98, 98.77] | 98.62 [98.34, 99.05] |
| Ophthalmologist           | 258                  | 40.70 [35, 46.96] | 97.29 [94, 98.90] | 99.10 [99, 99.47]    | 93.78 [93, 94.80] | 98.78 [98.56, 99.17] | 55                 | 78.18 [65, 88.19] | 90.91 [80, 96.98]    | 99.28 [99, 99.59]   | 97.47 [97, 98.08] | 99.02 [98.37, 99.59] | 38               | 73.68 [57, 86.60] | 65.79 [49, 80.37] | 99.55 [99, 99.78]    | 99.69 [99, 99.87]    | 99.44 [99.01, 99.93]  | 179             | 58.10 [51, 65.42] | 98.88 [96, 99.86]   | 97.32 [97, 97.99]  | 97.47 [97, 98.12] | 99.59 [99.48, 99.73] |
| Ophthalmologist           | 226                  | 83.63 [78, 88.20] | 98.67 [96, 99.73] | 97.33 [95, 98.57]    | 90.35 [87, 92.82] | 98.20 [97.19, 98.63] | 56                 | 60.71 [47, 73.50] | 98.21 [90, 99.95]    | 99.70 [99, 99.96]   | 91.48 [89, 93.50] | 98.83 [98.35, 99.35] | 33               | 78.79 [61, 91.02] | 84.85 [68, 94.89] | 99.85 [99, 100.00]   | 99.41 [99, 99.84]    | 99.26 [98.54, 99.76]  | 132             | 80.30 [72, 86.71] | 95.45 [91, 98.31]   | 99.11 [99, 99.71]  | 94.49 [92, 96.23] | 98.05 [97.44, 98.83] |
| Ophthalmologist           | 100                  | 67.00 [57, 76.08] | 97.00 [91, 99.38] | 98.05 [97, 98.72]    | 96.32 [95, 97.27] | 97.96 [96.51, 99.13] | 26                 | 65.38 [44, 82.79] | 92.31 [75, 99.05]    | 99.36 [99, 99.71]   | 98.51 [98, 99.07] | 97.81 [94.44, 99.88] | 15               | 46.67 [21, 73.41] | 80.00 [52, 95.67] | 99.51 [99, 99.80]    | 99.86 [99, 99.98]    | 97.48 [93.97, 99.97]  | 58              | 63.79 [50, 76.01] | 98.28 [91, 99.96]   | 99.56 [99, 99.86]  | 97.43 [96, 98.27] | 99.31 [99.24, 99.61] |
| Ophthalmologist           | 150                  | 90.00 [84, 94.29] | 89.33 [83, 93.78] | 95.15 [94, 96.35]    | 98.35 [97, 99.02] | 98.78 [98.16, 98.87] | 58                 | 70.69 [57, 81.91] | 84.48 [73, 92.65]    | 99.66 [99, 99.91]   | 97.97 [97, 98.70] | 98.90 [98.65, 99.44] | 51               | 74.51 [60, 85.67] | 68.63 [54, 80.89] | 99.83 [99, 99.98]    | 99.75 [99, 99.95]    | 99.37 [99.24, 99.69]  | 81              | 53.09 [42, 64.27] | 98.77 [93, 99.97]   | 99.82 [99, 99.98]  | 97.05 [96, 97.97] | 99.60 [99.47, 99.76] |
| Ophthalmologist           | 138                  | 61.59 [53, 69.74] | 99.28 [96, 99.98] | 100.00 [100, 100.00] | 95.43 [94, 96.38] | 99.66 [99.52, 99.76] | 37                 | 64.86 [47, 79.79] | 94.59 [82, 99.34]    | 99.94 [100, 100.00] | 98.32 [98, 98.86] | 99.73 [99.47, 99.85] | 26               | 69.23 [48, 85.67] | 88.46 [70, 97.55] | 100.00 [100, 100.00] | 99.83 [100, 99.97]   | 99.84 [99.67, 99.95]  | 71              | 45.07 [33, 57.34] | 100.00 [95, 100.00] | 99.89 [100, 99.99] | 98.86 [98, 99.30] | 99.79 [99.70, 99.85] |

**Supplementary Table 4. Performance of grader and algorithm by region for DR and DME for all gradable images.** The order of regions reported is randomized to partially anonymize regional graders' metrics. n=Number of positive cases for each condition in each region.

| <b>Regional Grader Expertise</b> | <b>Regional Grader Kappa</b> | <b>Algorithm Kappa</b>  |
|----------------------------------|------------------------------|-------------------------|
| (All regions)                    | 77.35<br>[71.16, 72.39]      | 84.44<br>[71.63, 73.80] |
| Nurse or Technician              | 64.16<br>[50.88, 54.74]      | 82.42<br>[66.23, 72.72] |
| Nurse or Technician              | 74.18<br>[57.49, 67.34]      | 86.63<br>[75.68, 86.42] |
| Nurse or Technician              | 80.35<br>[76.18, 85.10]      | 86.17<br>[66.05, 72.56] |
| Nurse or Technician              | 81.29<br>[73.62, 79.13]      | 87.09<br>[70.04, 76.85] |
| Nurse or Technician              | 80.83<br>[66.30, 75.59]      | 82.88<br>[68.60, 74.36] |
| Nurse or Technician              | 65.82<br>[57.70, 64.94]      | 84.47<br>[65.55, 69.48] |
| Ophthalmologist                  | 62.41<br>[59.74, 70.98]      | 73.66<br>[58.94, 67.81] |
| Ophthalmologist                  | 87.45<br>[83.26, 85.95]      | 85.77<br>[77.74, 80.59] |
| Ophthalmologist                  | 68.60<br>[47.12, 56.06]      | 78.52<br>[63.58, 70.70] |
| Ophthalmologist                  | 86.23<br>[71.54, 83.18]      | 85.58<br>[66.94, 74.23] |
| Ophthalmologist                  | 83.81<br>[68.52, 75.12]      | 86.02<br>[74.09, 83.95] |
| Ophthalmologist                  | 80.86<br>[70.10, 78.20]      | 84.95<br>[63.03, 69.35] |
| Ophthalmologist                  | 67.08<br>[56.16, 69.57]      | 82.26<br>[63.75, 74.08] |

**Supplementary Table S5. Performance of the grader compared to the algorithm by region for DR.** Agreement is measured in terms of quadratic weighted kappa and unweighted kappa for the 4 categories of DR (No/Mild, Moderate, Severe, Proliferative)

| <b>Camera Make</b> | <b>Camera Models</b>                                   |
|--------------------|--------------------------------------------------------|
| 3nethra            | Classic                                                |
| Canon              | CR-2                                                   |
| Kowa               | VX-10, VX-20, Nonmyd 7, Nonmyd WD, Nonmyd a-D III 8300 |
| Nidek              | AFC-210, AFC-230, AFC-300                              |
| Topcon             | TRC NW-8                                               |
| Zeiss              | Visucam 200                                            |

**Supplementary Table 6. Camera make and models used in the study.** 31 total cameras (1-6 per region) were used to acquire the fundus images.

## DR images flowchart

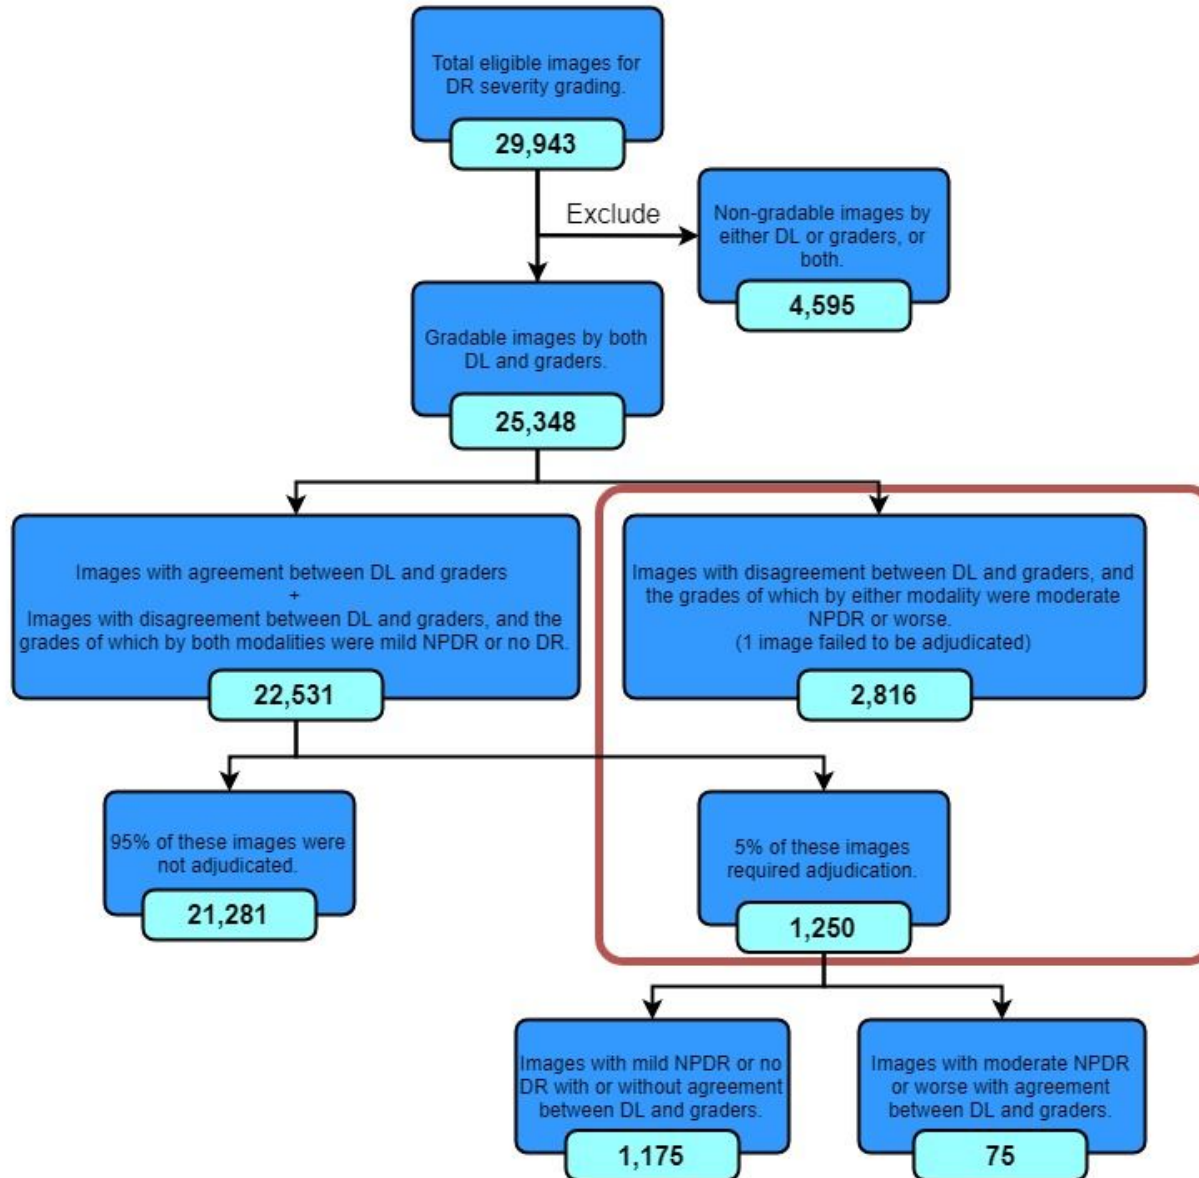

**Supplementary Figure 1. Flowchart of images eligible for adjudication for DR severity levels by retinal specialists according to study protocols. The criteria and number of images for the adjudication were within the red rounded rectangle.**

## DME images flowchart

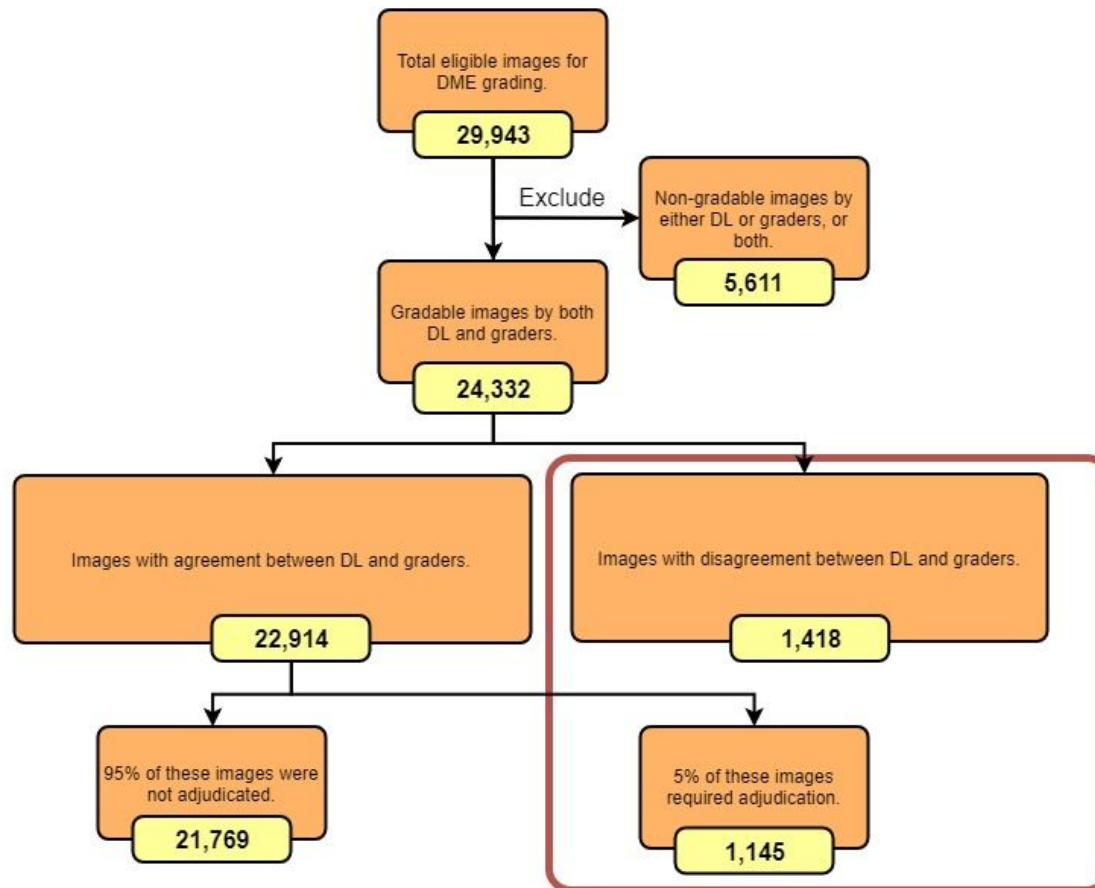

**Supplementary Figure 2. Flowchart of images eligible for adjudication for DR severity levels by retinal specialists according to study protocols.** The criteria and number of images for the adjudication were within the red rounded rectangle.



### A. Severe NPDR and PDR

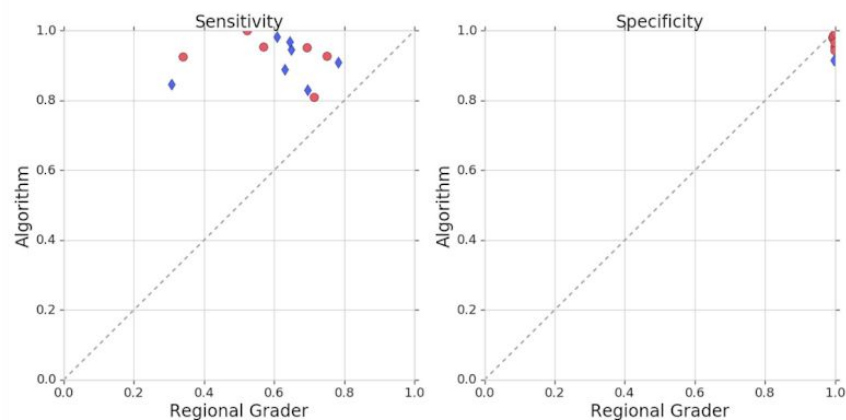

### B. PDR

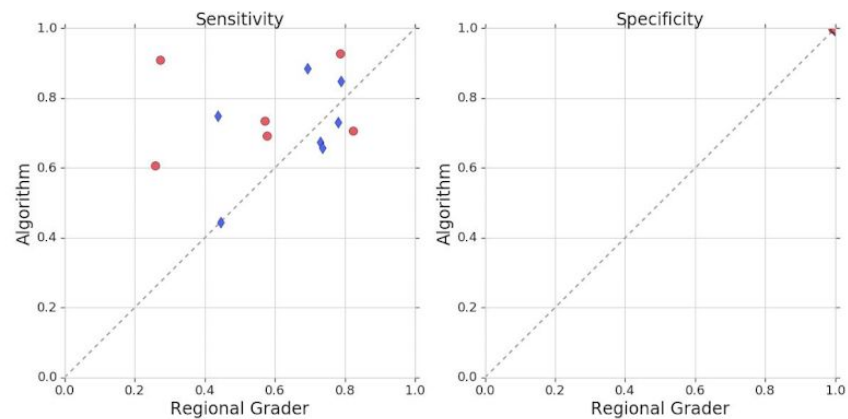

### C. Moderate or worse DR and/or DME

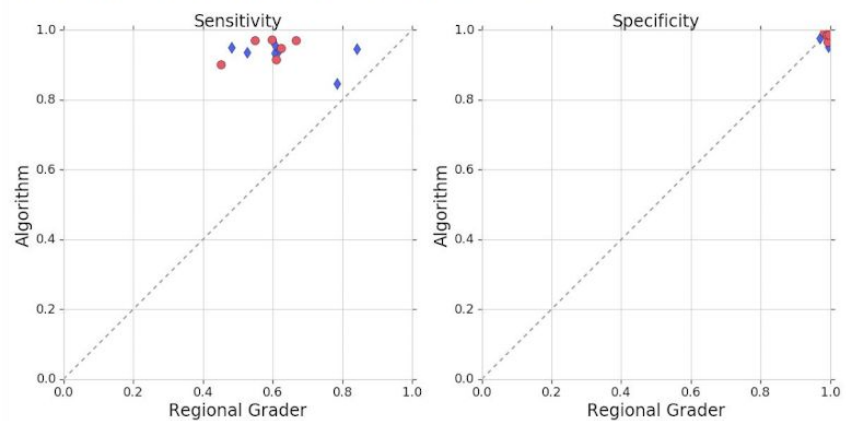

### D. PDR and/or DME

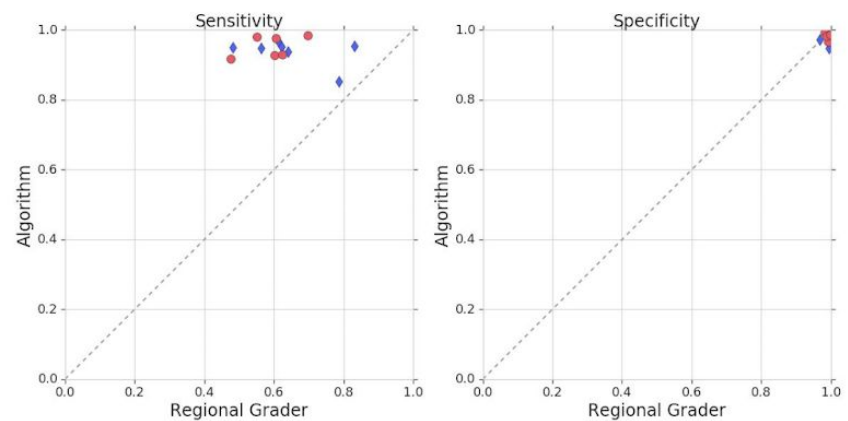

**Supplementary Figure 3. Performance of algorithm and regional graders for varying and combination of DR and DME.** Grader performances are represented as blue diamonds (ophthalmologists) and red dots (nurse or technician) for (A) Severe NPDR and PDR, (B) PDR, (C) Moderate or worse DR and/or DME, (D) PDR and/or DME. Analysis is performed on all gradable images. The rest of the combinations are in Figure 2 of the main manuscript.

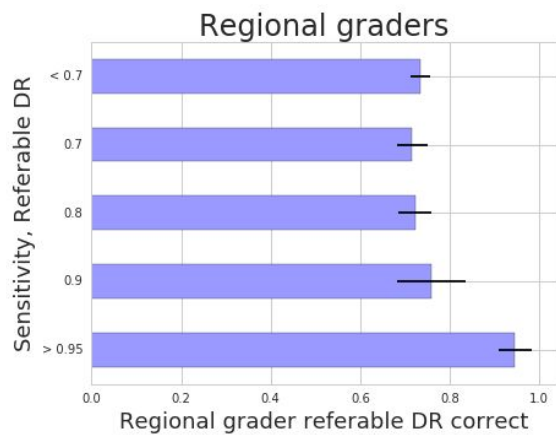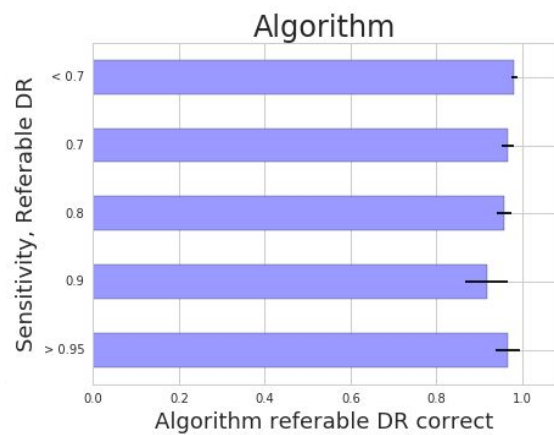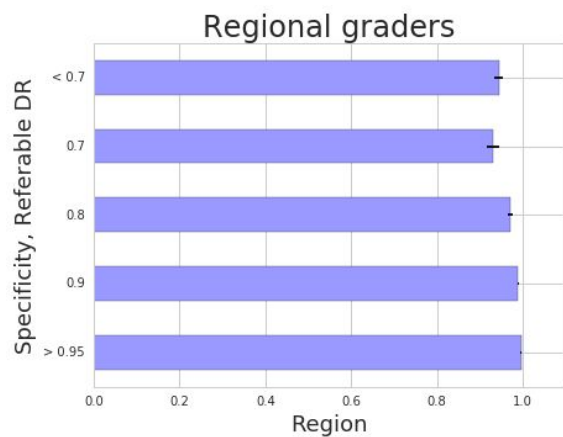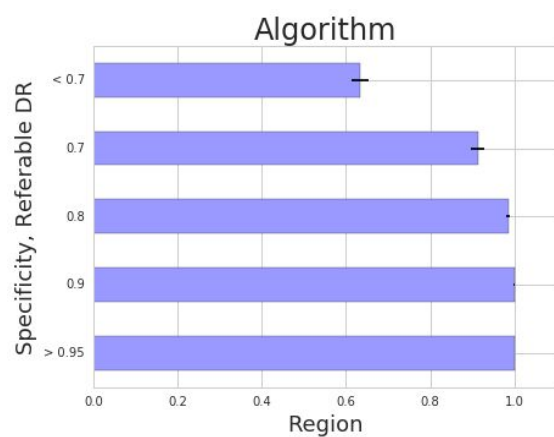

**Supplementary Figure 4. Comparison of regional grader and algorithm sensitivity and specificity based on algorithm maximum confidence score.** The algorithm is more sensitive than regional graders at all levels of confidence but less specific for low-confidence images (where the algorithm confidence scores <0.7).

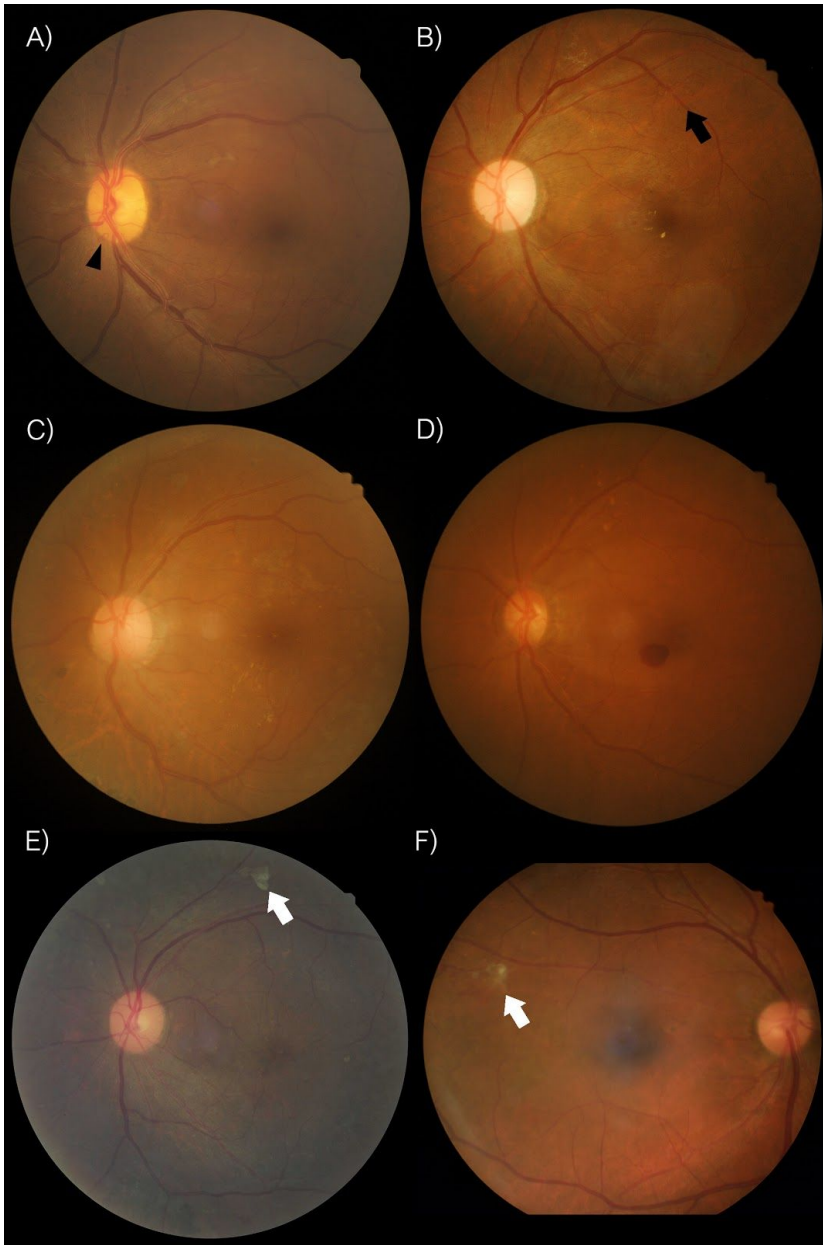

**Supplementary Figure 5. Sample of cases missed by the algorithm and regional grader.** Figures A) and B) show obscure neovascularization at disc and elsewhere respectively. Figure C) contains panretinal photocoagulation scars at the edge of the image. Figure D) contains preretinal hemorrhage. Figures E) and F) contain inactive fibrous tissue.
